# Supplementary material for: Automatic volcanic ash detection from MODIS observations using a back-propagation neural network
Source: Copernicus journal article supplement (doi:10.5194/amt-8-5089-2015), 2015-12-08
Supplement: Supplementary file 1 [file amt-8-5089-2015-supplement.zip]

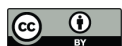

## *Supplement of*

# **Automatic volcanic ash detection from MODIS observations using a back-propagation neural network**

**T. M. Gray and R. Bennartz**

*Correspondence to:* R. Bennartz ([ralf.bennartz@vanderbilt.edu](mailto:ralf.bennartz@vanderbilt.edu))

- [amt-8-5089-2015-supplement-title-page.pdf](#)
- TGray\_Supplement
  - .DS\_Store
  - [amt-2015-173-supplement.pdf](#)
  - [ash\\_test\\_dataset.csv](#)
  - [so2ash\\_test\\_dataset.csv](#)

The copyright of individual parts of the supplement might differ from the CC-BY 3.0 licence.
